# Supplementary material for: DNA-selective hybridization and dual strand invasion of short double-stranded DNA using pyren-1-ylcarbonyl-functionalized 4′-C-piperazinomethyl-DNA
Source: Royal Society of Chemistry journal article supplement (doi:10.1039/b402414a), 2004-01-01
Supplement: b402414a.doc [file b402414a.doc]

**Synthesis of phosphoramidites 1 and 2**

Synthesis of the phosphoramidite building blocks 1 and 2 is illustrated in the Scheme below. The 4’-*C*-hydroxymethyl group of nucleoside **3** (H. Thrane, J. Fensholdt, M. Regner, and J. Wengel, *Tetrahedron*, 1995, **51**, 10389) was converted into the corresponding triflate that was reacted with piperazine to give the 4’-*C*-piperazinomethyl nucleoside **4**. The free amino group of **4** was Fmoc-protected and the 3’-O-*tert*-butyldimethysilyl group removed giving nucleoside **6a** (via nucleoside **5a**). Alternatively, nucleoside **4** was condensed with 1-pyrenecarboxylic acid to give nucleoside 6**b** after 3’-O-desilylation of nucleoside **5b**. Standard phosphitylation of nucleosides **6a** and **6b** afforded the phophoramidite buliding blocks **1** (20% yield from **4**) and **2** (23% from **4**)

**Scheme** i) a) Tf2O, anhydrous pyridine, CH2Cl2, r.t., b) piperazine, anhydrous THF, 50 °C, 54%; ii) 9-fluorenylmethyl chloroformate, anhydrous pyridine, r.t., 98%; iii) 1-pyrenecarboxylic acid, CDI, anhydrous CH2Cl2, r.t., 75%; iv) (for **5a**) triethylamine tris-hydrofluoride, pyridine hydrochloride, THF, r.t., 70%; v) (for **5b**) TBAF, THF, r.t., 81%; vi) 2-cyanoethyl *N*,*N*-diisopropylphosphoramido chloridite, DIPEA, CH2Cl2, r.t., 64% (for **1**), 71% (for **2**).

**Procedure for recording flouresence emission spectra**

The measurements were carried out in oxygen free (argon saturated) medium salt buffer (10 mM sodium phosphate, 100 mM sodium chloride, 0.1mM EDTA, pH 7.0) using ca. 0.15 µM concentration of **ON7** in ca. 2/3 molar ratio to target. Exicitation was done at wavelength (λex) 340 nm with a slit width at 4.00 nm and emission slit width at 2.50 nm. The measurements were performed on a PerkinElmer LS 55 luminescence spectrocmeter.
